# Supplementary material for: PEDF Inhibits the Activation of NLRP3 Inflammasome in Hypoxia Cardiomyocytes through PEDF Receptor/Phospholipase A2
Source: MDPI journal article supplement (doi:10.3390/ijms17122064), 2016-12-12
Supplement: s1 [file s1]

# Supplementary Materials: PEDF Inhibits the Activation of NLRP3 Inflammasome in Hypoxia Cardiomyocytes through PEDF Receptor/Phospholipase A2

Zhongxin Zhou, Zhu Wang, Qiuhua Guan, Fan Qiu, Yufeng Li, Zhiwei Liu, Hao Zhang, Hongyan Dong and Zhongming Zhang

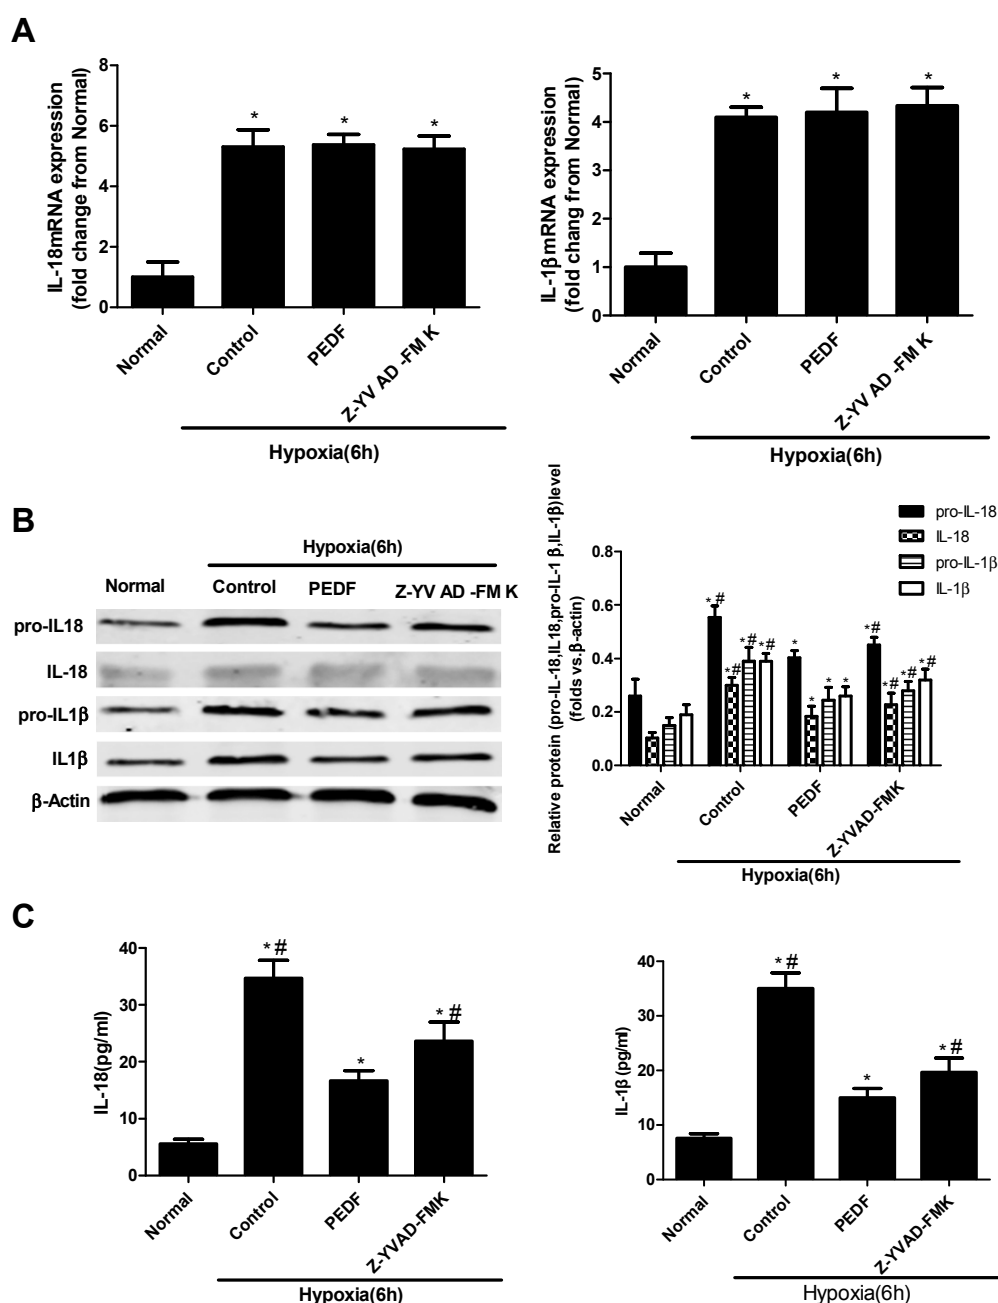

**Figure S1.** Effects of PEDF on the mRNA expression of IL-1β/18 and the protein levels of pro-IL18/1β and IL-1β/18. (A) IL-1β/18 mRNA expression was examined by real-time PCR. The results were expressed as the relative expression to β-actin and plotted as the ratio of the control group ( $n = 4$ ;  $* p < 0.05$  vs. the control group); (B) Representative Western blot analyses of pro-IL18/1β and IL-1β/18 expression ( $n = 4$ ;  $* p < 0.05$  vs. the control group;  $\# p < 0.05$  vs. the PEDF group); (C) ELISA analyzed the concentrations of IL-1β/18 in the culture medium ( $n = 4$ ;  $* p < 0.05$  vs. the control group;  $\# p < 0.05$  vs. the PEDF group). Data are expressed as the mean  $\pm$  SD.

PEDF inhibited the hypoxia-induced increase of pro-IL18/1 $\beta$  and IL-1 $\beta$ /18 protein levels and secreted levels. Real-time RT-PCR revealed that the expression of IL-1 $\beta$ /18 mRNA was significantly increased in cardiomyocytes undergoing hypoxia. However, compared with the control group, treatment with PEDF and Z-YVAD-FMK had no effect on the mRNA expression of IL-1 $\beta$ /18 (Figure S1A). Western blot analysis showed that protein levels of pro-IL18/1 $\beta$  and IL-1 $\beta$ /18 were significantly increased in cardiomyocytes. However, pro-IL18/1 $\beta$  and IL-1 $\beta$ /18 protein levels were significantly lower in the PEDF and Z-YVAD-FMK group compared with the control group (Figure S1B). Similar to the Western blot result, the secreted levels of IL-1 $\beta$  and IL-18 in the cultured supernatant of neonatal cardiomyocytes were significantly lower in the PEDF and Z-YVAD-FMK group compared with the control group (Figure S1C).
